# Supplementary material for: Aspiration Is Associated with Poor Treatment Response in Pediatric Pulmonary Vein Stenosis
Source: MDPI journal article supplement (doi:10.3390/children8090783), 2021-09-07
Supplement: s1 [file s1]

Supplemental Table S1. Sex Differences.

|                                               | <b>Males<br/>(n = 34)</b> | <b>Females<br/>(n = 35)</b> | <b>p value</b> |
|-----------------------------------------------|---------------------------|-----------------------------|----------------|
| Premature                                     | 15 (45%)                  | 17 (49%)                    | 0.81           |
| Genetic Syndrome                              | 6 (18%)                   | 12 (34%)                    | 0.17           |
| Presence of CHD                               |                           |                             |                |
| None                                          | 4 (12%)                   | 4 (11%)                     |                |
| ASD/VSD/AVSD/PDA                              | 12 (35%)                  | 14 (40%)                    | 0.66           |
| TAPVC/PAPVC                                   | 9 (26%)                   | 5 (14%)                     |                |
| All others                                    | 9 (26%)                   | 12 (34%)                    |                |
| Pulmonary Venous Connections                  |                           |                             |                |
| Normal                                        | 22 (65%)                  | 25 (71%)                    |                |
| PAPVC                                         | 3 (9%)                    | 4 (11%)                     | 0.70           |
| TAPVC                                         | 9 (26%)                   | 6 (17%)                     |                |
| Bilateral Disease at Diagnosis                | 31 (91%)                  | 28 (80%)                    | 0.31           |
| Lung Disease                                  | 24 (71%)                  | 20 (57%)                    | 0.32           |
| Age at Start of Treatment (years)             | 0.6 (0.4, 1.0)            | 0.6 (0.4, 1.1)              | 0.89           |
| PA/Ao Systolic Ratio at Start of Treatment    | 0.8 (0.6, 1.0)            | 0.7 (0.5, 1.0)              | 0.80           |
| Clinically Significant Aspiration             | 18 (53%)                  | 13 (37%)                    | 0.23           |
| Frequency of Interventions after 12 mo of     |                           |                             |                |
| Imatinib Mesylate                             |                           |                             |                |
| ≤12 weeks                                     | 6 (18%)                   | 0 (0%)                      | 0.004*         |
| >12 weeks                                     | 22 (65%)                  | 33 (94%)                    |                |
| Not reported                                  | 6 (18%)                   | 2 (6%)                      |                |
| Use of Bevacizumab                            |                           |                             |                |
| Received at Initial Treatment                 |                           |                             |                |
| Added during first 12 mo of Imatinib          | 6 (18%)                   | 4 (11%)                     | 0.31           |
| Mesylate                                      | 5 (15%)                   | 2 (6%)                      |                |
| None                                          | 23 (68%)                  | 29 (83%)                    |                |
| Listed for Lung Transplant during first 12 mo |                           |                             |                |
| of Imatinib Mesylate                          | 5 (15%)                   | 4 (11%)                     | 0.73           |
| Underwent Lung Transplant during first 12     |                           |                             |                |
| mo of Imatinib Mesylate                       | 2 (6%)                    | 3 (9%)                      | 1.0            |
| Alive after 12 mo on Imatinib Mesylate        | 29 (85%)                  | 33 (94%)                    | 0.26           |
| Poor Treatment Response                       | 14 (41%)                  | 5 (14%)                     | 0.016*         |

Values shown are either number (percent) or median (interquartile range). Abbreviations: CHD, congenital heart disease; ASD, atrial septal defect; VSD, ventricular septal defect; AVSD, atrioventricular septal defect; PDA, patent ductus arteriosus; TAPVC, total anomalous pulmonary venous connection; PAPVC, partial anomalous pulmonary venous connection; PA, pulmonary artery; Ao, aorta.
